# Supplementary material
Source: PubMed Central journal article supplement (PMC1458983)
Supplement: pnas_0601109103_1.pdf [file pnas_0601109103_1.pdf]

**Supplementary Table 1. DNA sequence of oligonucleotides used as substrates.**

| Name | DNA sequence*                                               | Strand† |
|------|-------------------------------------------------------------|---------|
| CGF  | 5'-TCACGGGATCAATGTGTTCTTTCAGCTCCGGTCACGCTGACCAGGAATACC-3'   | U       |
| MGF  | 5'-TCACGGGATCAATGTGTTCTTTCAGCTCMGGTCACGCTGACCAGGAATACC-3'   | U       |
| TGF  | 5'-TCACGGGATCAATGTGTTCTTTCAGCTCTGGTCACGCTGACCAGGAATACC-3'   | U       |
| UGF  | 5'-TCACGGGATCAATGTGTTCTTTCAGCTCUGGTCACGCTGACCAGGAATACC-3'   | U       |
| G29F | 5'-TCACGGGATCAATGTGTTCTTTCAGCTCOGGTCACGCTGACCAGGAATACC-3'   | U       |
| MCGF | 5'-TCACGGGATCAATGTGTTCTTTCAGCTMCGGTCACGCTGACCAGGAATACC-3'   | U       |
| TCGF | 5'-TCACGGGATCAATGTGTTCTTTCAGCTTCGGTCACGCTGACCAGGAATACC-3'   | U       |
| UCGF | 5'-TCACGGGATCAATGTGTTCTTTCAGCTUCGGTCACGCTGACCAGGAATACC-3'   | U       |
| CGR  | 3'-AGTGCCCTAGTTACACAAGAAAGTCGAGGCCAGTGCGACTGGTCCTTATGG-5'   | L       |
| AGR  | 3'-AGTGCCCTAGTTACACAAGAAAGTCGAGACCAGTGCGACTGGTCCTTATGG-5'   | L       |
| MGR  | 3'-AGTGCCCTAGTTACACAAGAAAGTCGAGGMCAGTGCGACTGGTCCTTATGG-5'   | L       |
| MCGR | 3'-AGTGCCCTAGTTACACAAGAAAGTCGAGGCMAGTGCGACTGGTCCTTATGG-5'   | L       |
| C29R | 3'-AGTGCCCTAGTTACACAAGAAAGTCGAGCCCAGTGCGACTGGTCCTTATGG-5'   | L       |
| CAGF | 5'-TCACGGGATCAATGTGTTCTTTCAGCTCCAGGTCACGCTGACCAGGAATACC-3'  | U       |
| TAGF | 5'-TCACGGGATCAATGTGTTCTTTCAGCTCTAGGTCACGCTGACCAGGAATACC-3'  | U       |
| UAGF | 5'-TCACGGGATCAATGTGTTCTTTCAGCTCUAGGTCACGCTGACCAGGAATACC-3'  | U       |
| MAGF | 5'-TCACGGGATCAATGTGTTCTTTCAGCTCMAGGTCACGCTGACCAGGAATACC-3'  | U       |
| CAGR | 3'-AGTGCCCTAGTTACACAAGAAAGTCGAGGTCCAGTGCGACTGGTCCTTATGG-5'  | L       |
| MAGR | 3'-AGTGCCCTAGTTACACAAGAAAGTCGAGGTMCAAGTGCGACTGGTCCTTATGG-5' | L       |
| CXF  | 5'-TCACGGGATCAATGTGTTCTTTCATATACCTATAACGCTGACCAGGAATACC-3'  | U       |
| MXF  | 5'-TCACGGGATCAATGTGTTCTTTCATATAMTATAACGCTGACCAGGAATACC-3'   | U       |
| TXF  | 5'-TCACGGGATCAATGTGTTCTTTCATATATTATAACGCTGACCAGGAATACC-3'   | U       |
| UXF  | 5'-TCACGGGATCAATGTGTTCTTTCATATAUATAACGCTGACCAGGAATACC-3'    | U       |
| CXR  | 3'-AGTGCCCTAGTTACACAAGAAAGTATATGATATTGCGACTGGTCCTTATGG-5'   | L       |

\*M, 5-meC; O, 8-OG. Relevant regions are boxed.

†U, upper strand; L, lower strand.
